# Supplementary material for: BSA-coated fluorescent organic–inorganic hybrid silica nanoparticles: preparation and drug delivery
Source: Royal Society of Chemistry journal article supplement (doi:10.1039/c6nj03915d), 2017-01-01
Supplement: c6nj03915d1.pdf [file c6nj03915d1.pdf]

## *Supporting Information*

### **BSA-Coated Fluorescent Organic-Inorganic Hybrid Silica Nanoparticles: Preparation, and Drug Delivery**

**Zengming Yang, Hengchang Ma, Zijie Jin, Haiying Cao, Lei Lei,  
Yucheng Ma, Ziqiang Lei**

*Key Laboratory of Eco-Environment-Related Polymer Materials of Ministry of Education, Key  
Laboratory of Polymer Materials of Gansu Province, College of Chemistry and Chemical  
Engineering, Northwest Normal University, Lanzhou 730070, China*

#### **Contents**

|                                                                 |               |
|-----------------------------------------------------------------|---------------|
| <b>1. General information.....</b>                              | <b>S2</b>     |
| <b>2. Synthetic procedures of TPA-1,TPA-2, and TB.....</b>      | <b>S3~S4</b>  |
| <b>4. Spectroscopic studies and images (Figures S1~S7).....</b> | <b>S5~S7</b>  |
| <b>5. Copies of NMR spectra(Figures S8~S10).....</b>            | <b>S8~S11</b> |

## **General information**

Triphenylamine (TPA, 99%), phosphorus oxychloride ( $\text{POCl}_3$ ),  $\text{SiO}_2$ , surface area  $300 \text{ m}^2/\text{g}$ , particle sizes 50-60 nm, density  $1.9 \text{ g/cm}^3$ , potassiumiodide (KI, 99%), Potassium Iodate( $\text{KIO}_3$ , 99%), Bovine Serum Albumin (BSA, 98%), Methylacrylate (MA, 98%), and Palladium acetate ( $\text{Pd}(\text{OAc})_2$ , 99%), 1,3-bis(diphenylphosphino)propane (DPPP, 98%), Triethylamine( $\text{Et}_3\text{N}$ , 99%) purchased from Aladdin Co. Other commercial reagents were purchased from Aladdin Co. and Energy Chemical Co. and used without further purification unless otherwise stated.  $\text{SiO}_2\text{-NH}_2$  nanoparticles were obtained by the documented method. (*J. Mater. Chem.*, **2012**, 22, 18961-18967)

Room temperature  $^1\text{H}$  NMR (600 MHz) and  $^{13}\text{C}$  NMR (150 MHz) spectra were recorded on a MERCURY spectrometer with  $\text{CDCl}_3$  as the solvent and tetramethylsilane (TMS) as the internal reference.

Fourier transform infrared (FT-IR) spectra were recorded on a Nicolet AVATAR 360 TF-IR spectrophotometer using KBr tablets. UV-visible absorption spectra (UV) were recorded on a TU-1901 spectrometer from 190 to 1100 nm.

Fluorescence spectra were measured using a PE LS-55 Luminescence/Fluorescence Spectrophotometer.

Circular dichroism were measured using a JASCO J805 Spectrometer.

Particle size measurements process were performed on a Zetasizer Nano ZS dynamic light scattering (DLS) system.

The morphology of  $\text{DNDT}\&\text{SiO}_2\text{-NH}_2$  and  $\text{BSA}\&\text{DNDT}\&\text{SiO}_2\text{-NH}_2$  was observed by scanning electron microscopy (SEM, ZEISS ULTRA PLUS). All the samples were prepared according to the standard methods.

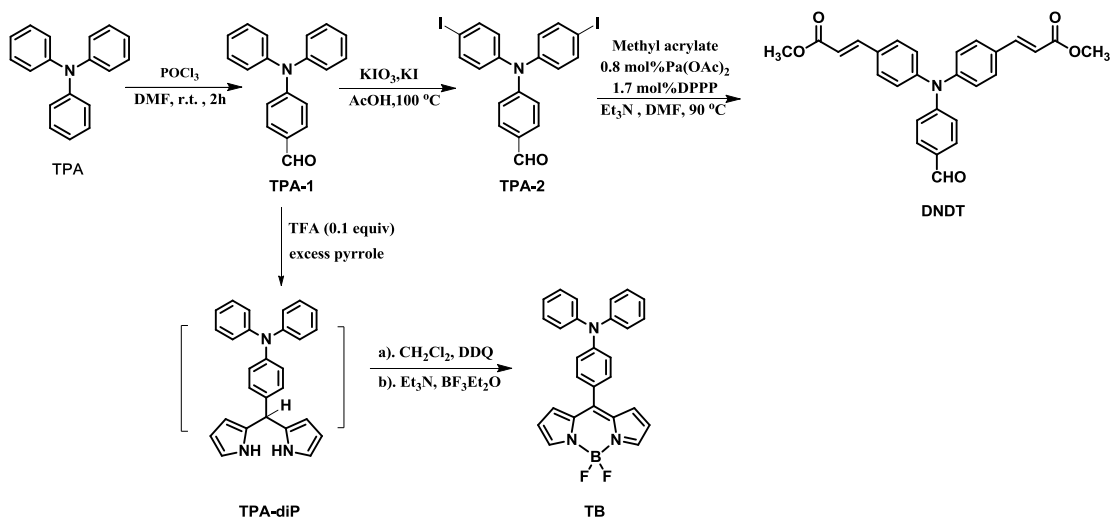

**Scheme S1** The synthetic route of **TPA-1**, **TPA-2** and **DNDT**.

### Synthesis of TPA-1

Triphenylamine (0.49 g, 2 mmol) was dissolved in DMF (8 mL) and placed in a 100 mL flask. phosphorousoxychloride (0.78 g, 5mmol) was added dropwise in ice bath, and the reaction mixture is stirred for 10 minutes at 0 °C. And then the mixture was refluxed at 45 °C for 8 h under N<sub>2</sub> atmosphere. The reaction solution was quenched with cold water (100 mL) and white solid was obtained. The residue was purified by column chromatography on silica gel (300-400 mesh) with a mixture of ethyl acetate and petroleum ether as eluent (1:100 by volume), leading to the purified TPA-1 0.44 g, yield: 75%. <sup>1</sup>H NMR (CDCl<sub>3</sub>): δ 9.76 (s, 1H), 7.70 (d, J = 8.8 Hz, 2H), 7.18-7.24 (d, J = 8.4 Hz, 6H), 7.42 (d, J = 8.0 Hz, 4H), 7.71 (d, J = 8.4 Hz, 2H),.

### Synthesis of TPA-2

In a 50 mL two necked round bottom flask, 1.6 g(6 mmol, 1.0 equiv) of 4-(diphenylamino)benzaldehyde and 2.241 g(13.5 mmol, 2.25equiv) of potassium iodide were dissolved in the mixture of acetic acid (24 mL) and H<sub>2</sub>O (2.4 mL) under N<sub>2</sub>. The mixture was warmed and stirred to yellow transparent solution, then potassium iodate 2.889 g (13.5 mmol, 2.25 equiv) was added within several times. The reaction mixture was warmed to reflux and stirred for 1 h. Then the mixture was cooled to room temperature and pour in distilled water, and dark yellow solid was obtained. The crude product was purified by column chromatography directly to afford 4-(bis(4-iodophenyl)amino)benzaldehyde (TPA-2) as an orange solid (2.6 g, 5.1 mmol, 84.8% yield). M.P.: 146-151 °C; <sup>1</sup>H NMR (600 MHz, CDCl<sub>3</sub>) δ (TMS, ppm): 9.84 (s, 1H), 7.71 (d, J = 8.3 Hz, 2H), 7.63 (d, J = 8.5 Hz, 4H), 7.05 (d, J = 8.3 Hz, 2H), 6.89 (d, J = 8.4 Hz, 4H). <sup>13</sup>C NMR (150 MHz, CDCl<sub>3</sub>) δ(ppm) 190.35, 152.17, 145.69, 138.85, 131.34, 130.31, 127.60, 120.75, 88.75. MS (FAB): m/z = 524.91 [M+H]<sup>+</sup>

### Synthesis of TB

Pyrrole (5 mL, 72 mmol) and TPA-1 (0.786 g, 2.88 mmol) are added to a dry 100 mL round-bottomed flask and degassed with a stream of N<sub>2</sub> for 5 min. TFA (22.2 μL, 0.5 mmol) was then added, and the solution is stirred under N<sub>2</sub> at room temperature. TLC analysis indicates that the disappearance of spots corresponds to TPA-1 and appearance of a new spot corresponds to compound TPA-diP. The solvent is removed on a rotary evaporator under vacuum, and the crude compound is passed through flash silica gel column chromatography with a mixture of ethyl acetate and petroleum ether as eluent (1:6 by volume). The resultant compound TPA-diP (0.389g, 1 mmol) is dissolved in freshly distilled dichloromethane and oxidized with DDQ (272.4 mg, 1.2 mmol) for 30 min at room temperature. The reaction mixture is then treated with a small amount of Et<sub>3</sub>N (5.6 mL, 40 mmol) followed by BF<sub>3</sub>•OEt<sub>2</sub> (6.3 mL, 50 mmol), and the mixture is stirred for an additional 30 min at room temperature. The solvent is removed in a rotary evaporator, and the resultant crude compound is purified by silica gel column chromatography with petroleum ether/ethyl acetate (3:1) and afforded pure TB (144.8mg, 26%) as a purple solid. Mp 212-214 °C; <sup>1</sup>H NMR (400 MHz, CDCl<sub>3</sub>) δ 7.90 (s, 2H), 7.40 (m, 6H), 7.23-7.06 (m, 10H), 6.55 (s, 2H) ppm. <sup>13</sup>C NMR (100 MHz, CDCl<sub>3</sub>): δ 150.94, 147.52, 146.47, 142.77, 134.63, 132.25, 131.00, 129.67, 126.22, 125.94, 124.70, 120.02, 117.95 ppm. MS (FAB): m/z = 435.17 [M+H]<sup>+</sup>. IR (KBr) : 3105, 3059, 3036, 1587, 1558, 1533, 1488, 1412, 1388, 1332, 1294, 1261, 1224, 1192, 1118, 1076, 980, 911, 757, 742, 696 cm<sup>-1</sup>.

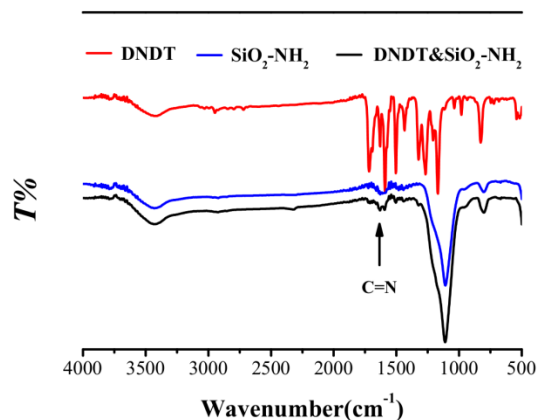

**Fig. S1** FT-IR spectrum of DNDT, SiO<sub>2</sub>-NH<sub>2</sub>, and DNDT&SiO<sub>2</sub>-NH<sub>2</sub>.

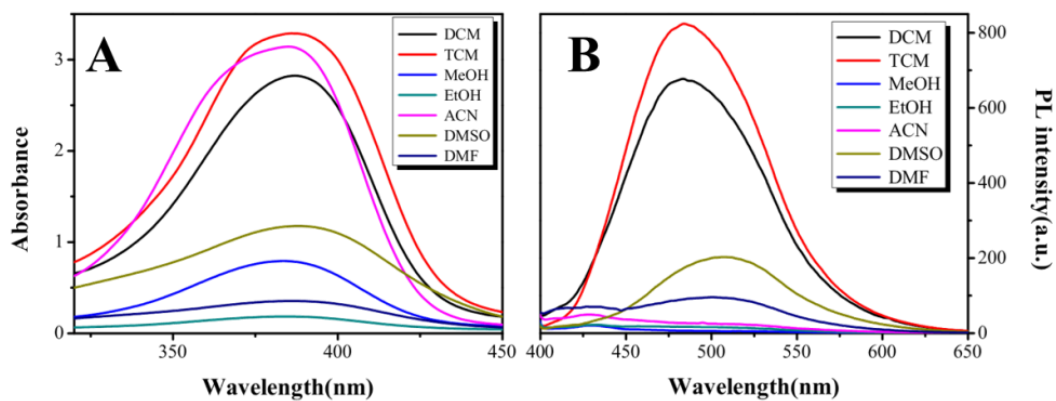

**Fig. S2** (A) Absorbance spectra of DNDT&SiO<sub>2</sub>-NH<sub>2</sub> in different solvents. (B) Emission spectra of DNDT&SiO<sub>2</sub>-NH<sub>2</sub> in different solvents. (solution concentration:  $5 \times 10^{-3}$  g/L,  $\lambda_{\text{ex}} = 370$  nm).

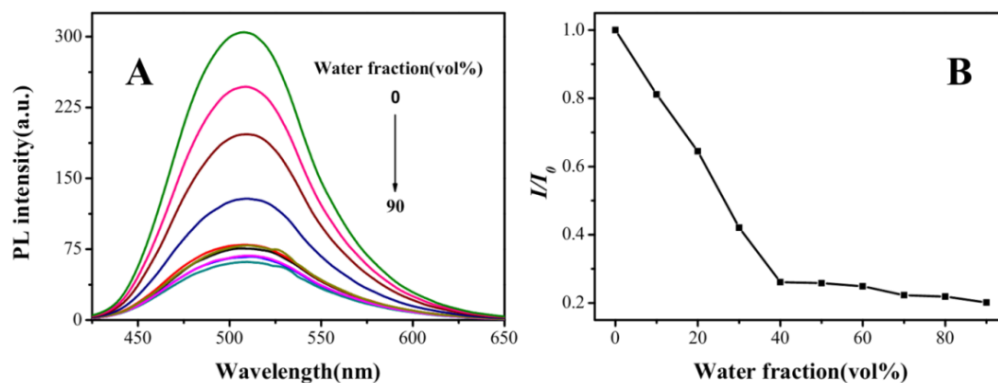

**Fig. S3** (A) Emission spectra of DNDT&SiO<sub>2</sub>-NH<sub>2</sub> in DMSO/water mixtures. (B) Plots of maximum emission intensity ( $I/I_0$ ) of DNDT&SiO<sub>2</sub>-NH<sub>2</sub> versus water fraction in the DMSO/H<sub>2</sub>O mixture. (solution concentration:  $5 \times 10^{-3}$  g/L,  $\lambda_{\text{ex}} = 370$  nm).

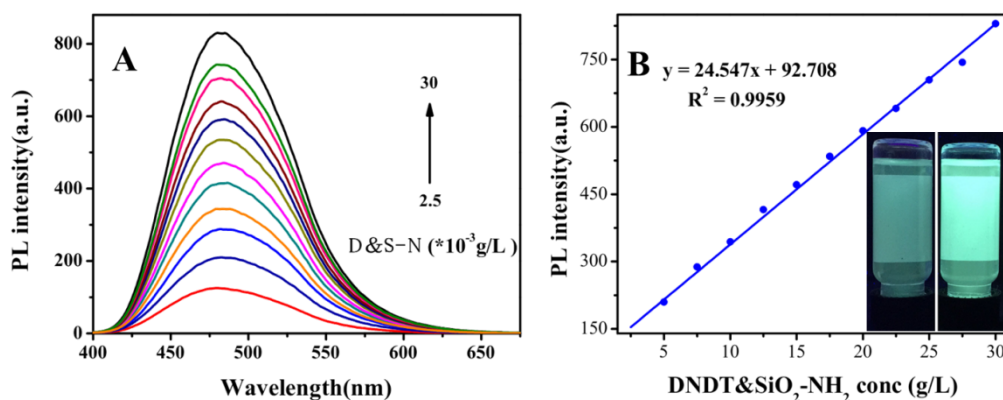

**Fig. S4** (A) Emission spectra of different mass concentration DNDT&SiO<sub>2</sub>-NH<sub>2</sub> in CHCl<sub>3</sub>. (B) Plot of PL enhancement versus DNDT&SiO<sub>2</sub>-NH<sub>2</sub> concentration. ( $I$  denotes the peak PL intensity and  $I_0$  denotes the peak PL intensity of DNDT&SiO<sub>2</sub>-NH<sub>2</sub> concentration = 2.5-30 × 10<sup>-3</sup> g/L. solution concentration: 5 × 10<sup>-3</sup> g/L,  $\lambda_{ex}$  = 370 nm)

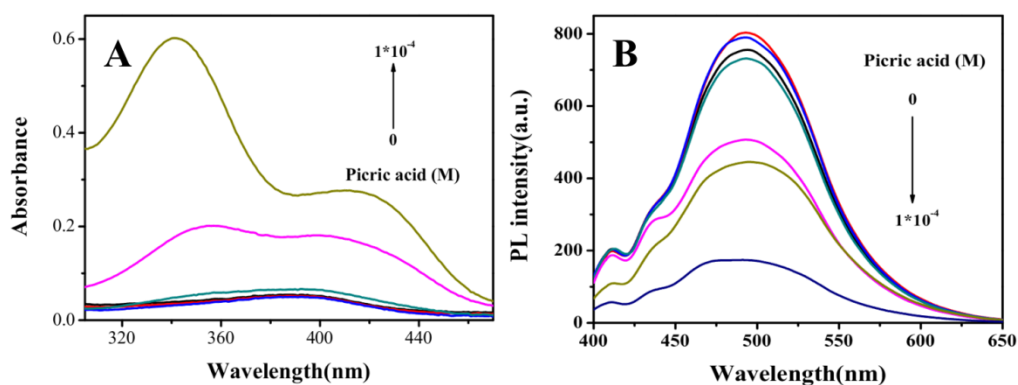

**Fig. S5** (A) Normalized absorption spectra of DNDT&SiO<sub>2</sub>-NH<sub>2</sub> at different PA concentrations. (B) Emission spectra of DNDT&SiO<sub>2</sub>-NH<sub>2</sub> at different PA concentrations. (DNDT&SiO<sub>2</sub>-NH<sub>2</sub> solution concentration: 5 × 10<sup>-3</sup> g/L,  $\lambda_{em}$  = 370 nm)

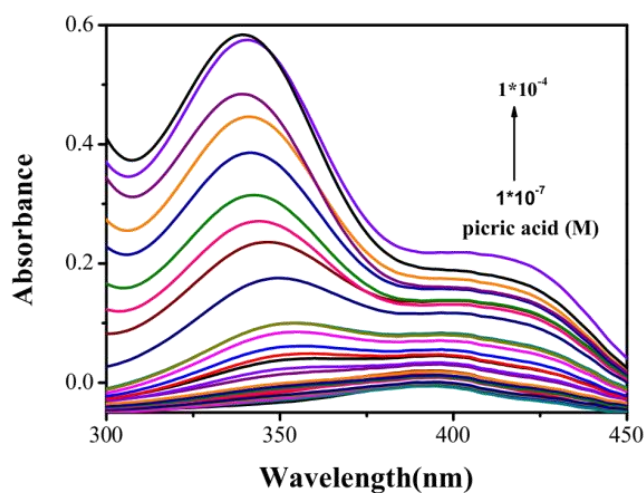

**Fig. S6** Normalized absorption spectra of DNDT&SiO<sub>2</sub>-NH<sub>2</sub> at different PA concentrations.

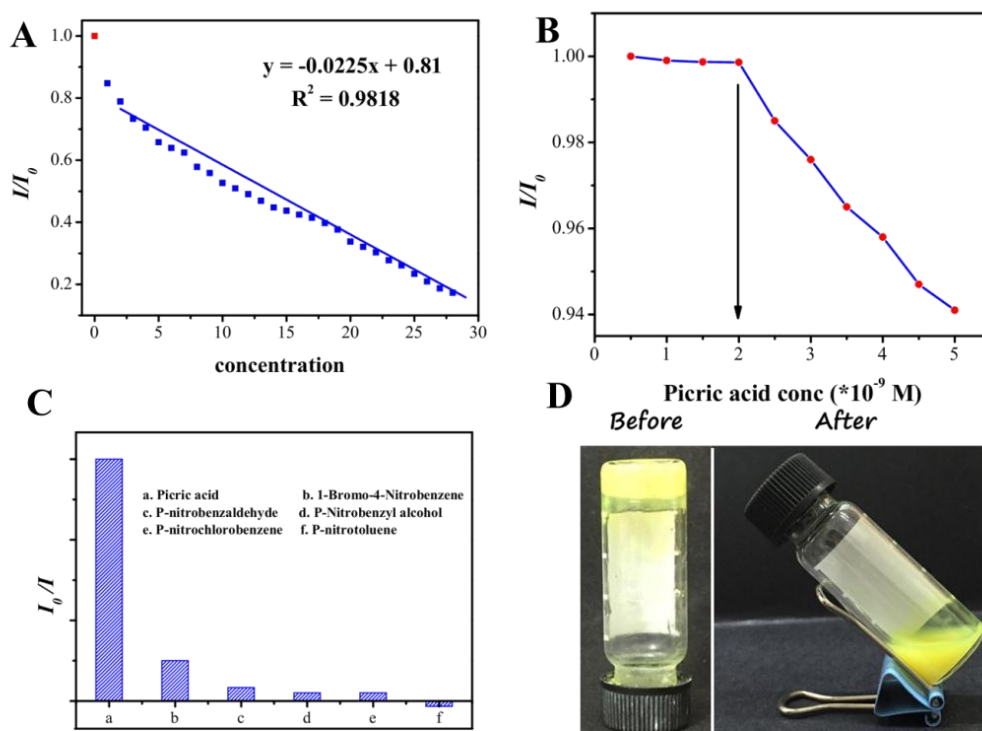

**Fig. S7** (A) The relative PL intensity ( $I/I_0$ ) of DNDT&SiO<sub>2</sub>-NH<sub>2</sub> at different PA concentrations. (B) The plot of detection limit analysis of DNDT&SiO<sub>2</sub>-NH<sub>2</sub> toward PA. ( $D_L = 2 \times 10^{-9}$  M = 2 PPb) (C) Selectivity graph of DNDT&SiO<sub>2</sub>-NH<sub>2</sub> toward various nitro derivatives. (D) Photograph of gel of DNDT&SiO<sub>2</sub>-NH<sub>2</sub> (on the left) and DNDT&SiO<sub>2</sub>-NH<sub>2</sub> within PA (on the right).

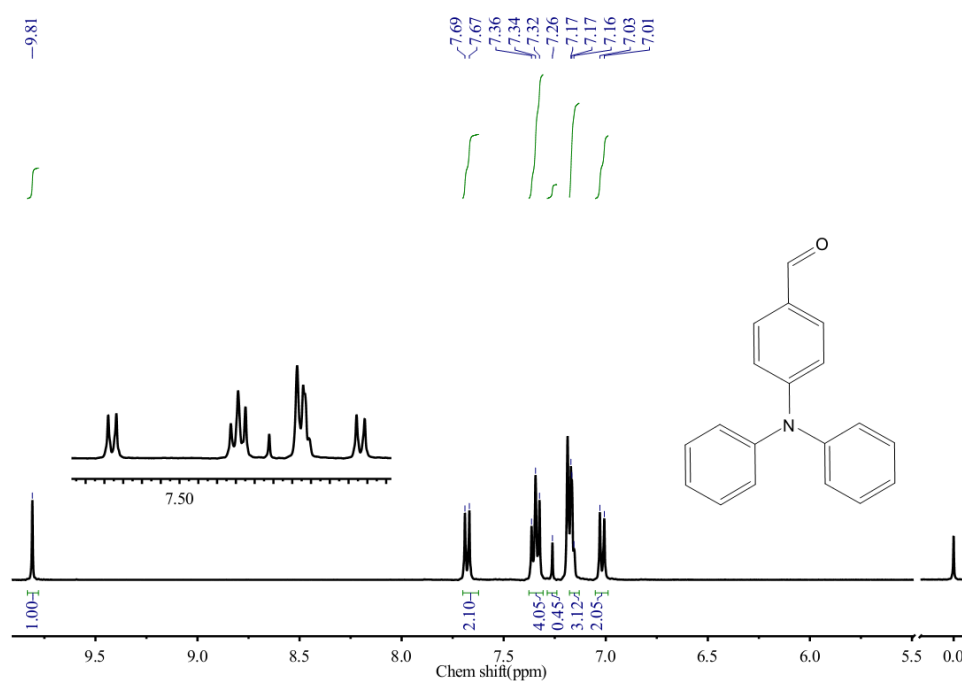

**Fig. 8** <sup>1</sup>H NMR spectra of TPA-1 in CDCl<sub>3</sub>.

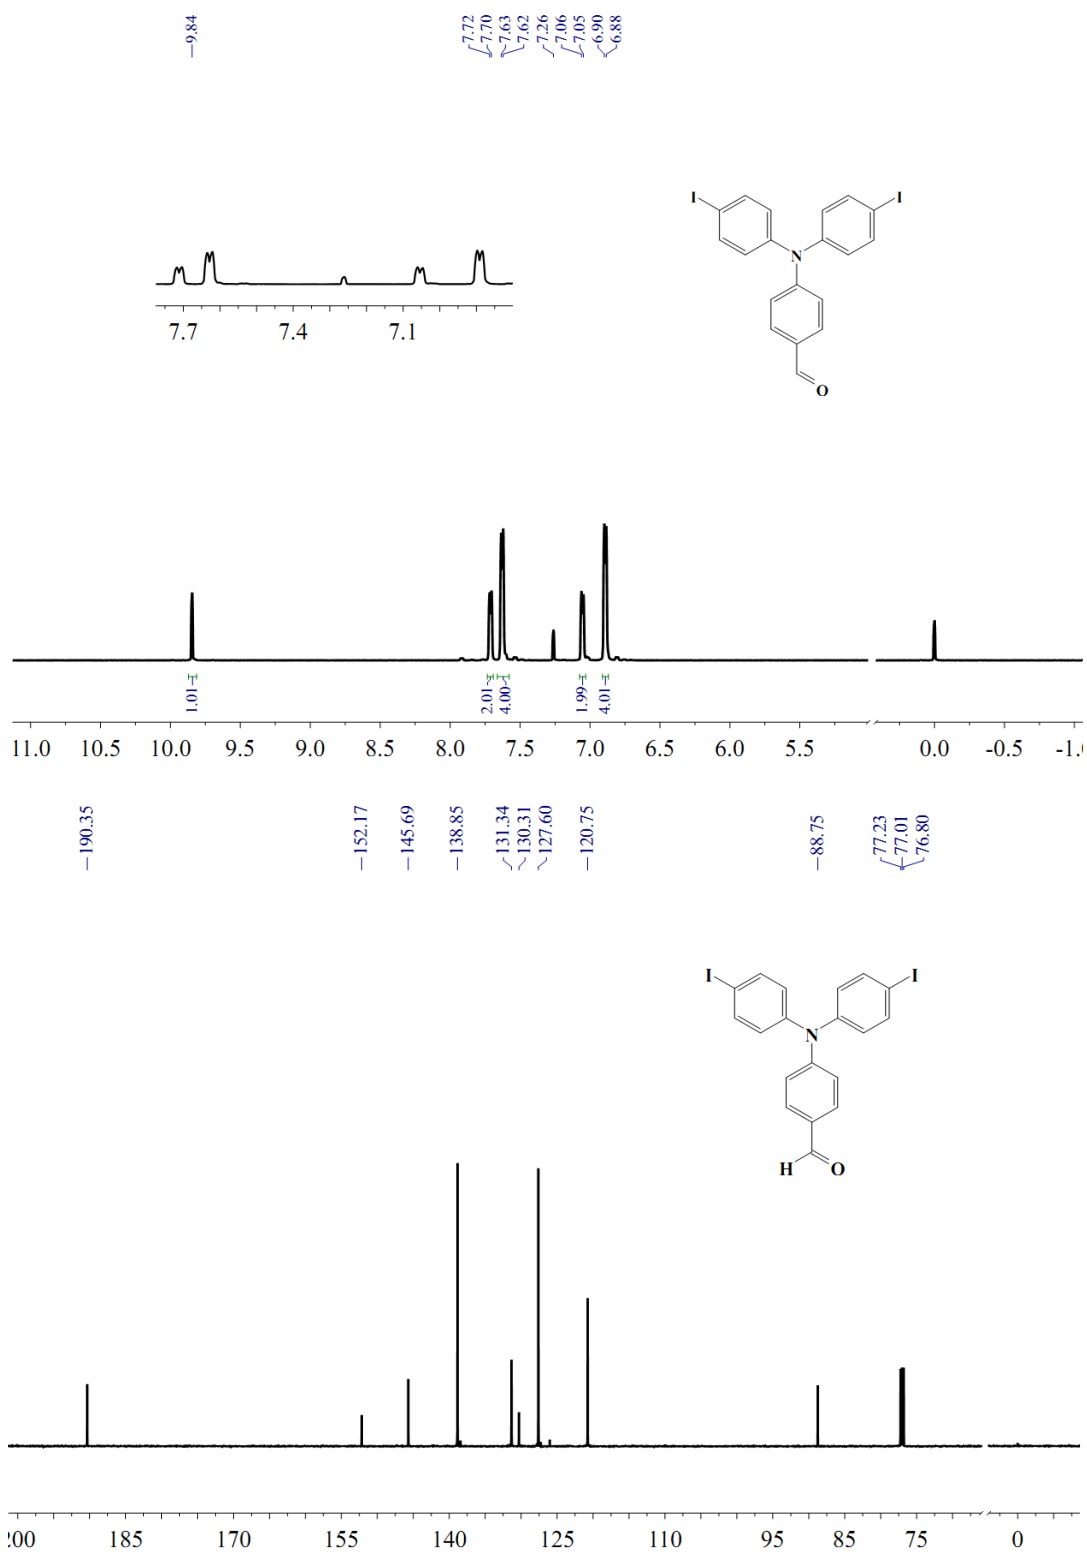

**Fig. 9** <sup>1</sup>H and <sup>13</sup>C NMR spectra of TPA-2 in CDCl<sub>3</sub>.



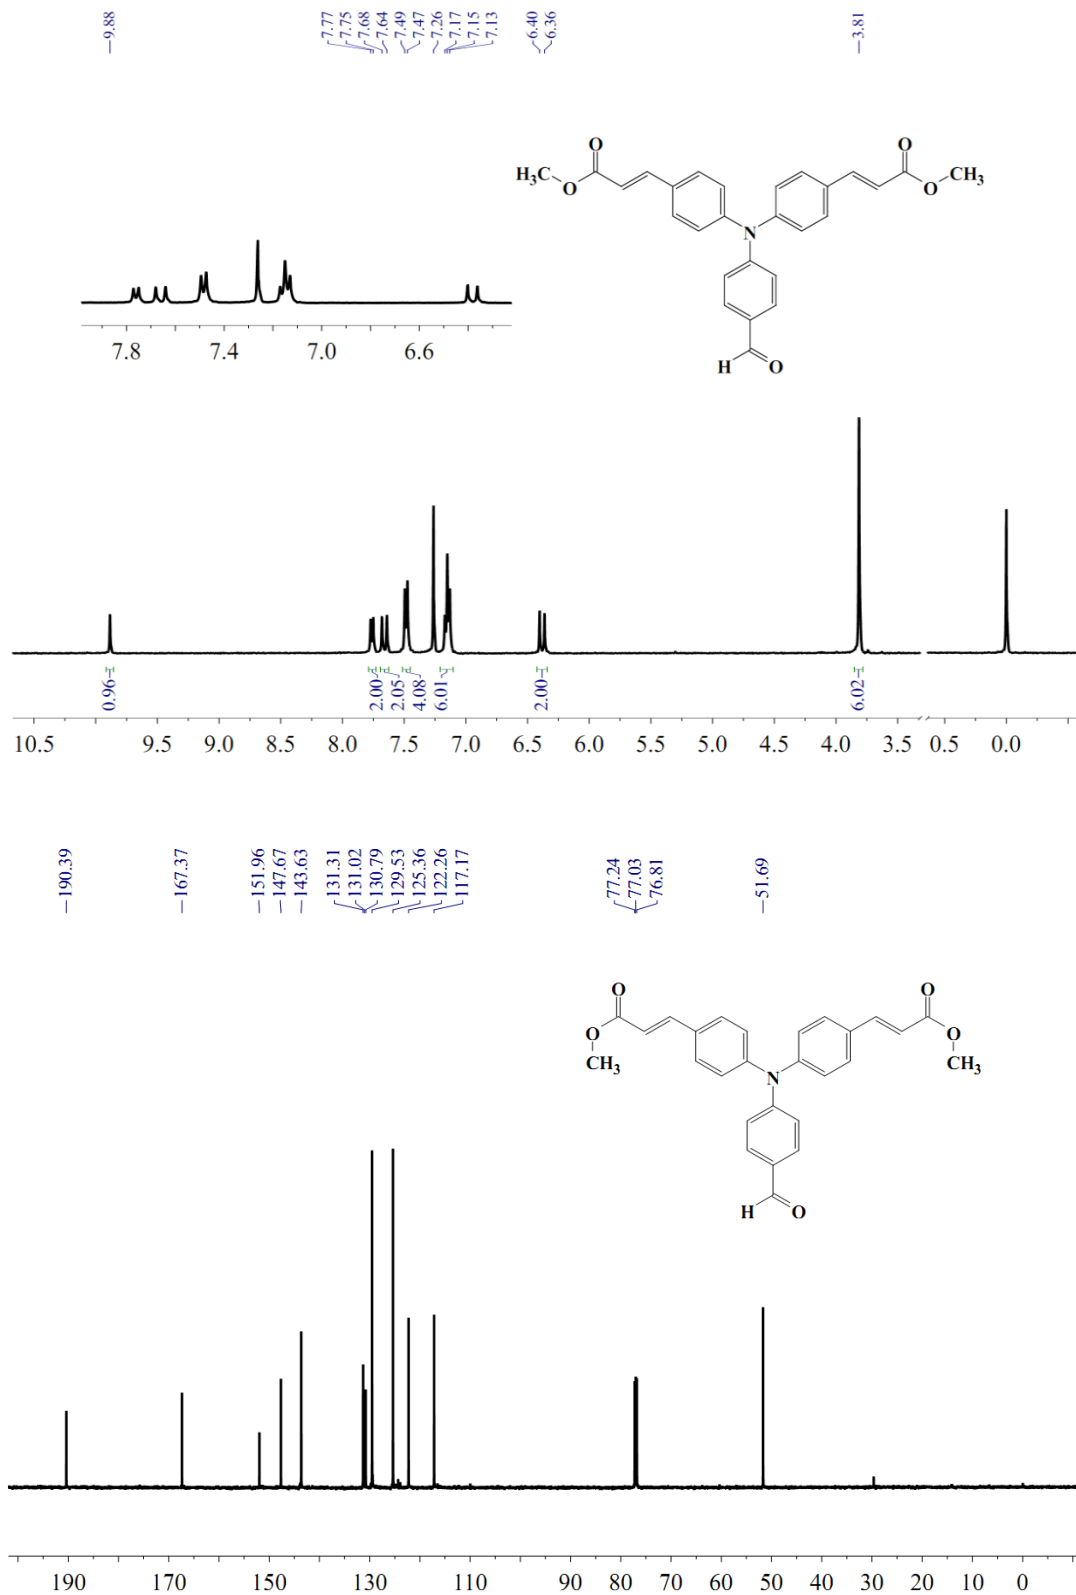

**Fig. 10**  $^1\text{H}$  and  $^{13}\text{C}$  NMR spectra of DNNDT in  $\text{CDCl}_3$ .

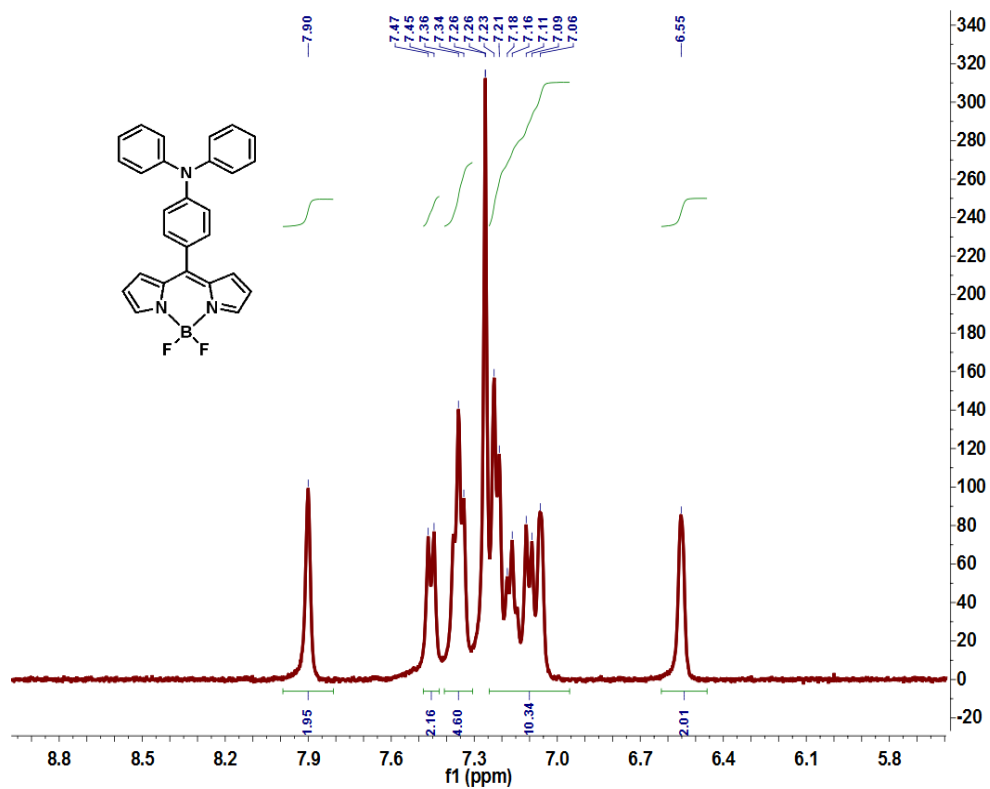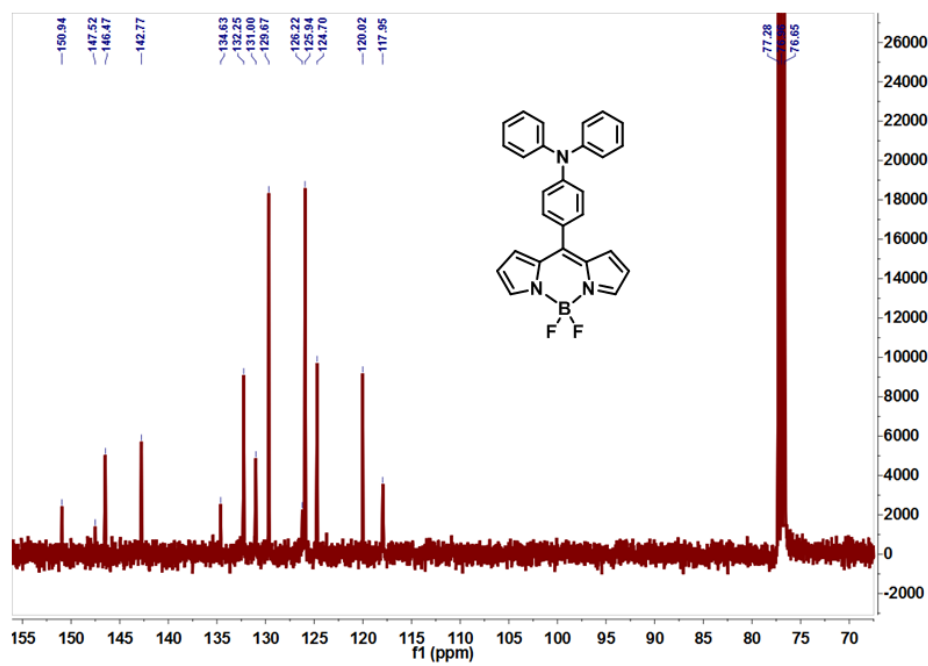

Fig. 11  $^1\text{H}$  and  $^{13}\text{C}$  NMR spectra of TB in  $\text{CDCl}_3$ .
